# Supplementary material for: Uteroplacental Insufficiency Causes Microbiota Disruption and Lung Development Impairment in Growth-Restricted Newborn Rats
Source: MDPI journal article supplement (doi:10.3390/nu14204388), 2022-10-19

Figure S1: Heatmap of intestinal microbiota in mothers.

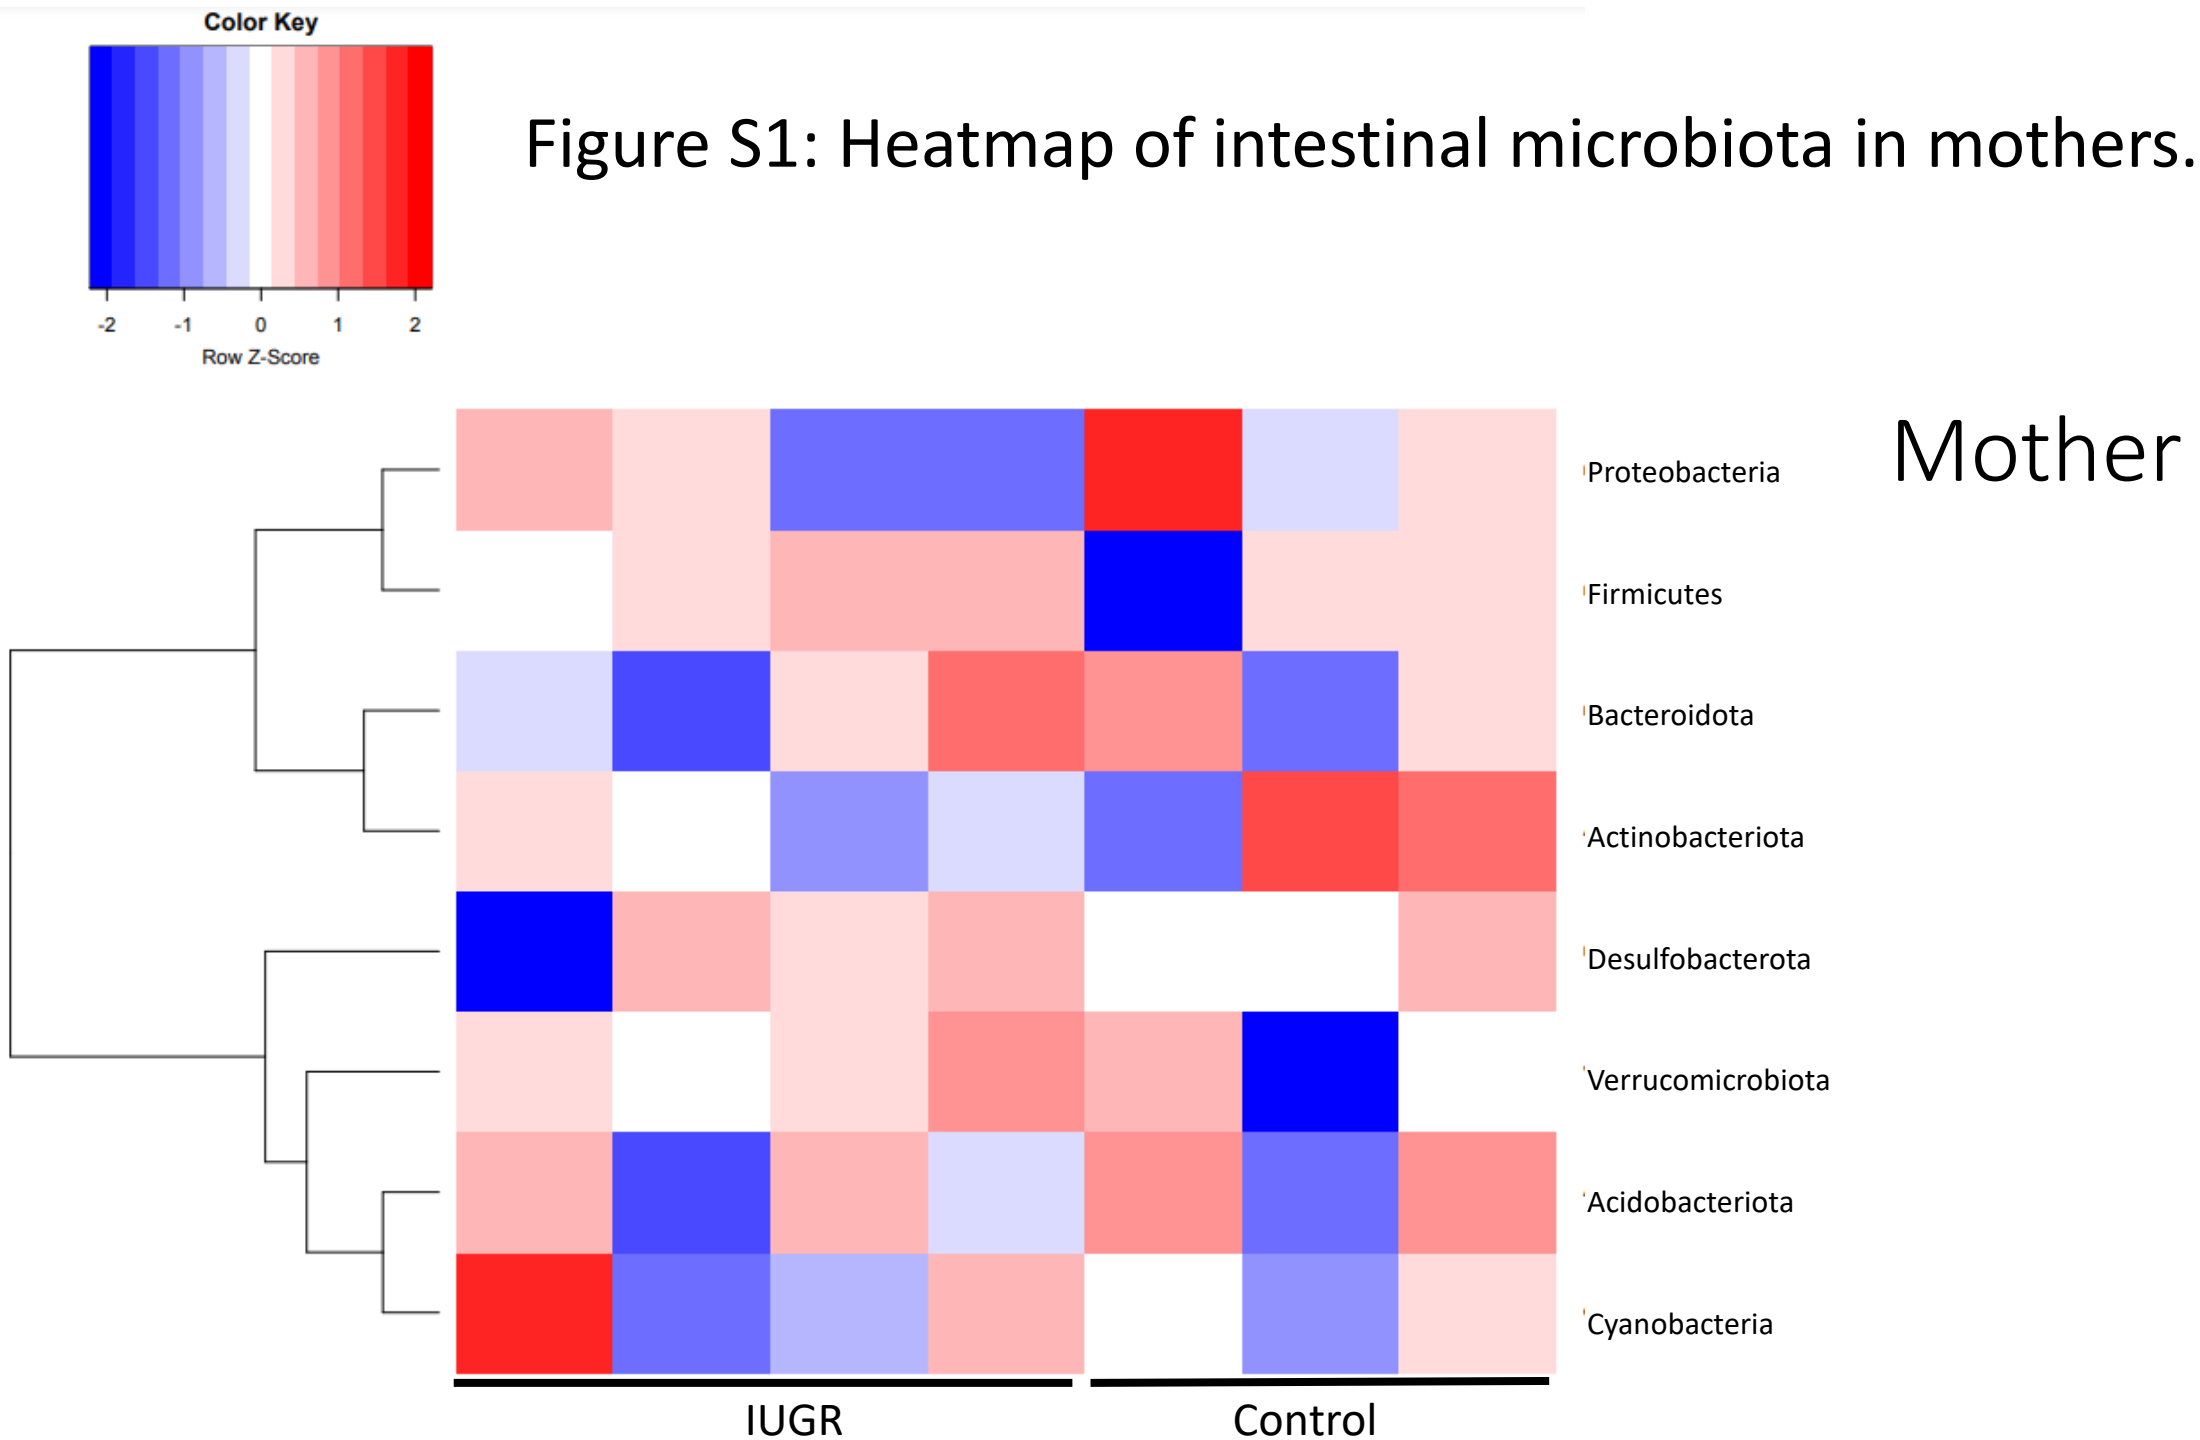

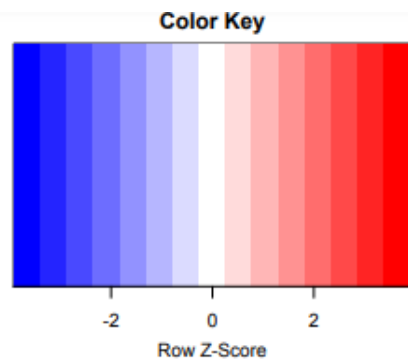

Figure S2: Heatmap of lung microbiota in rats on postnatal day 0.

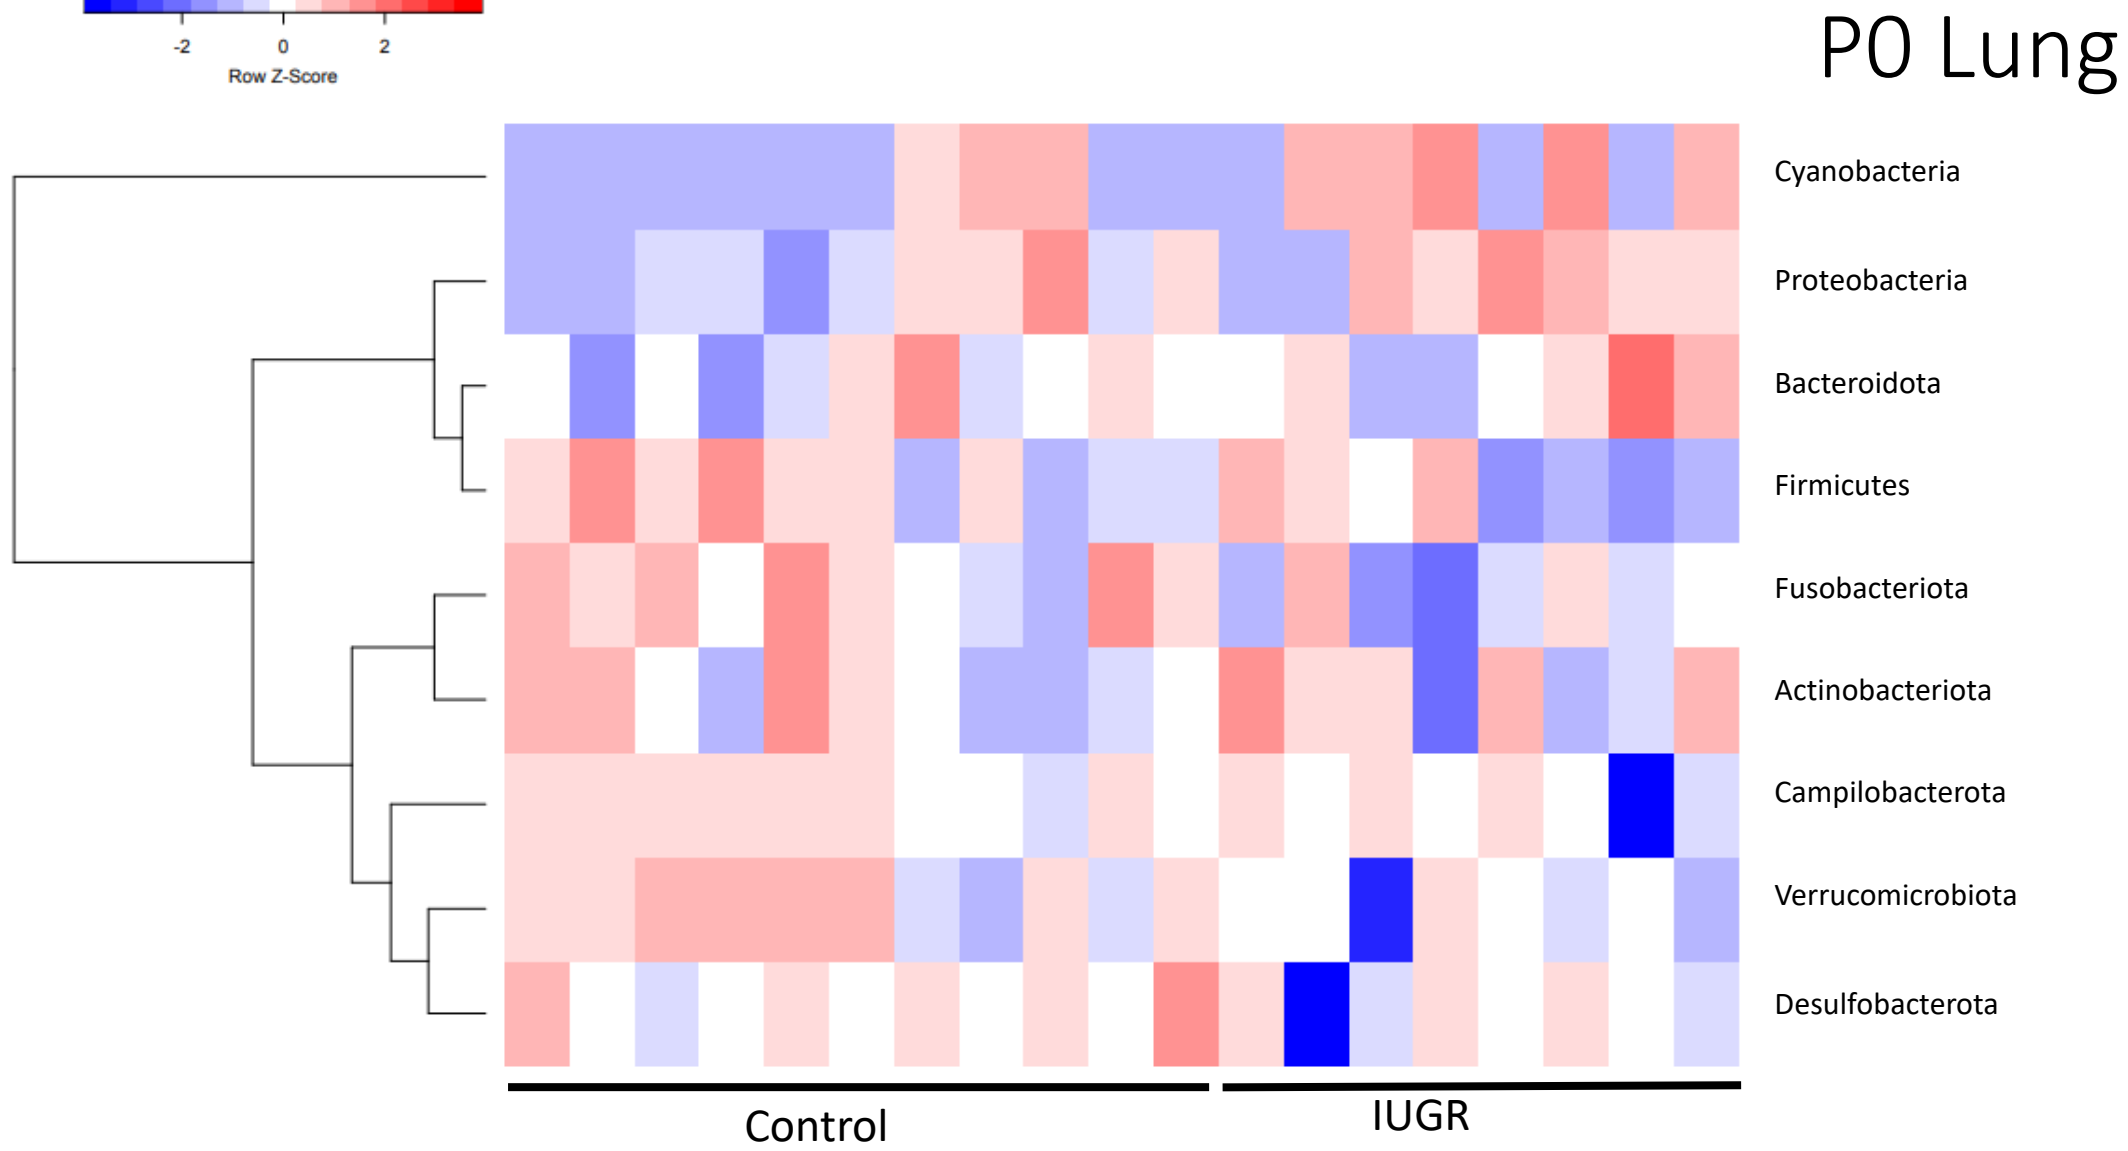

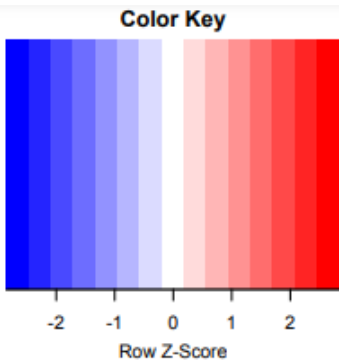

Figure S3: Heatmap of intestinal microbiota in rats on postnatal day 0.

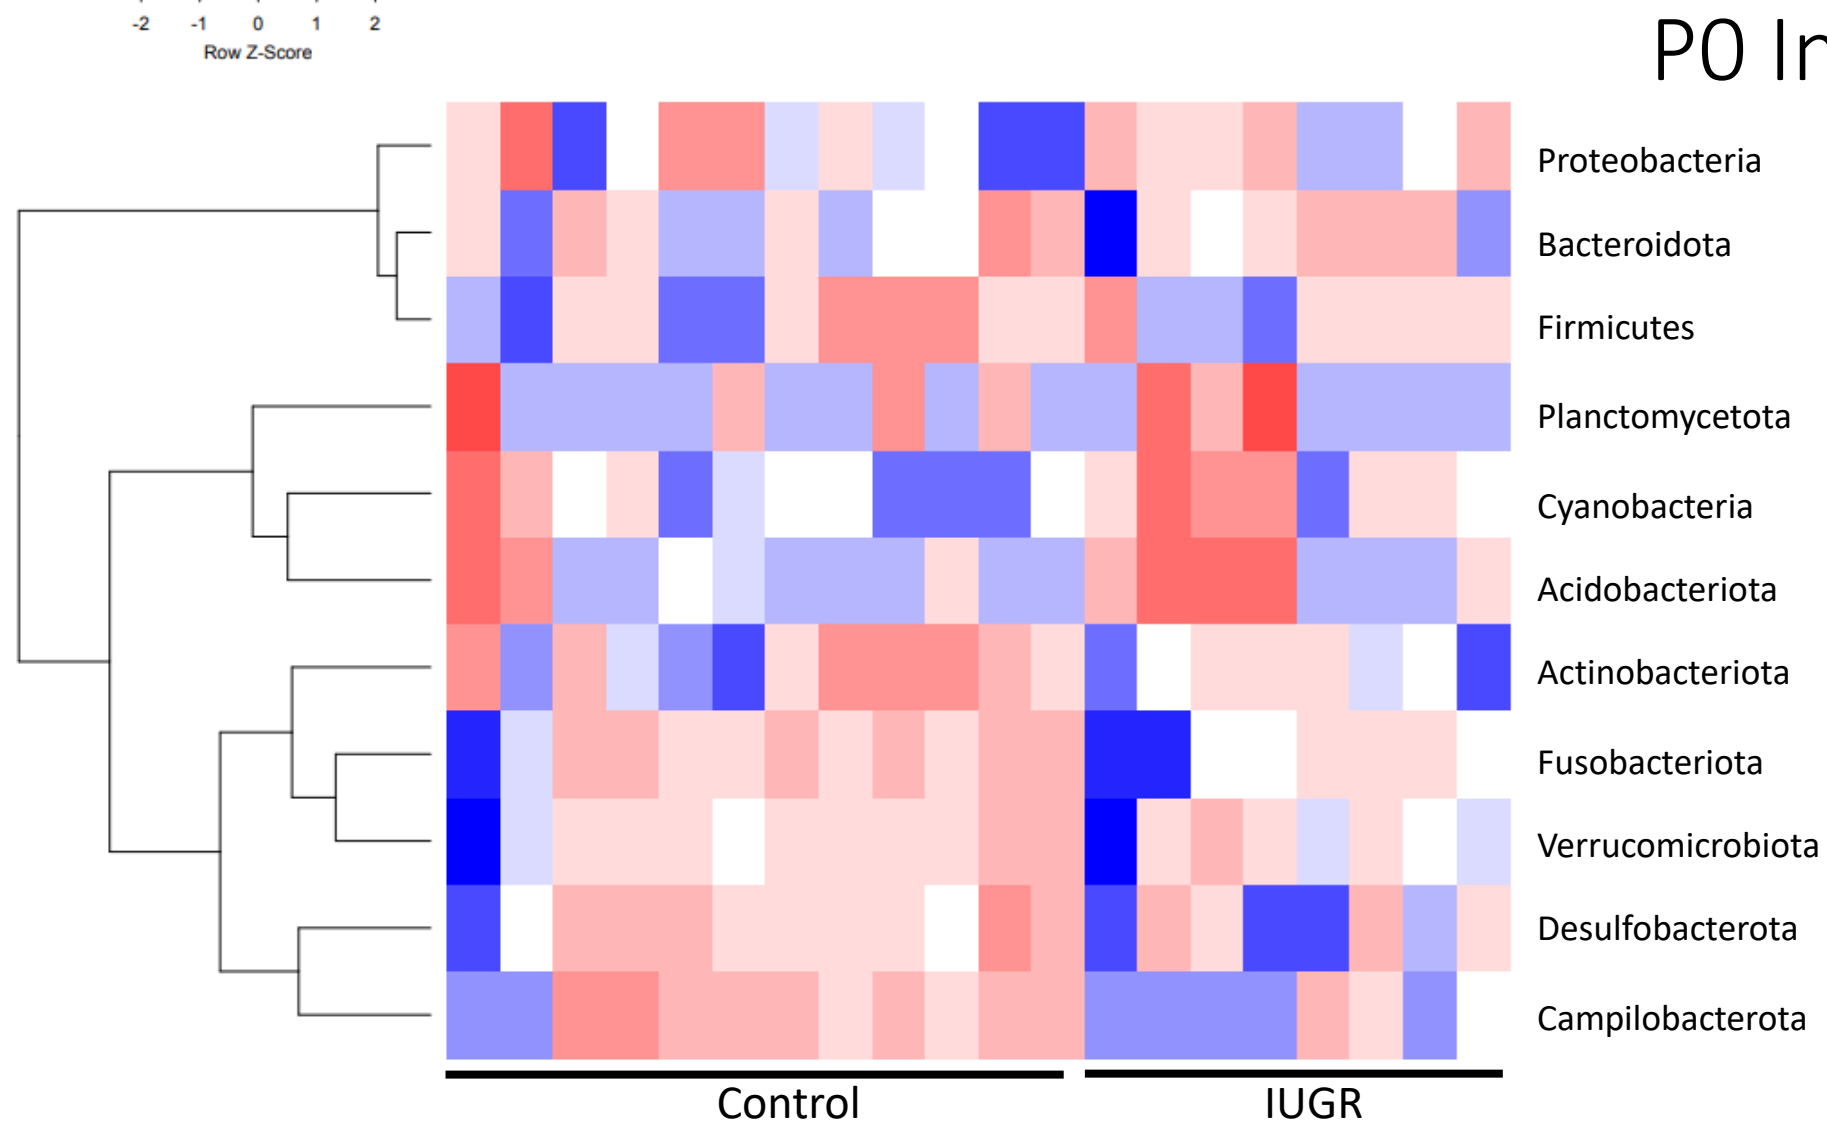

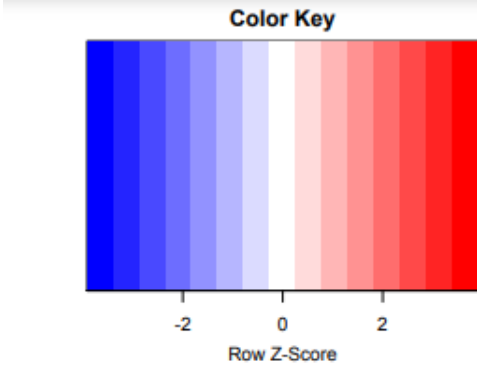

Figure S4: Heatmap of lung microbiota in rats on postnatal day 7.

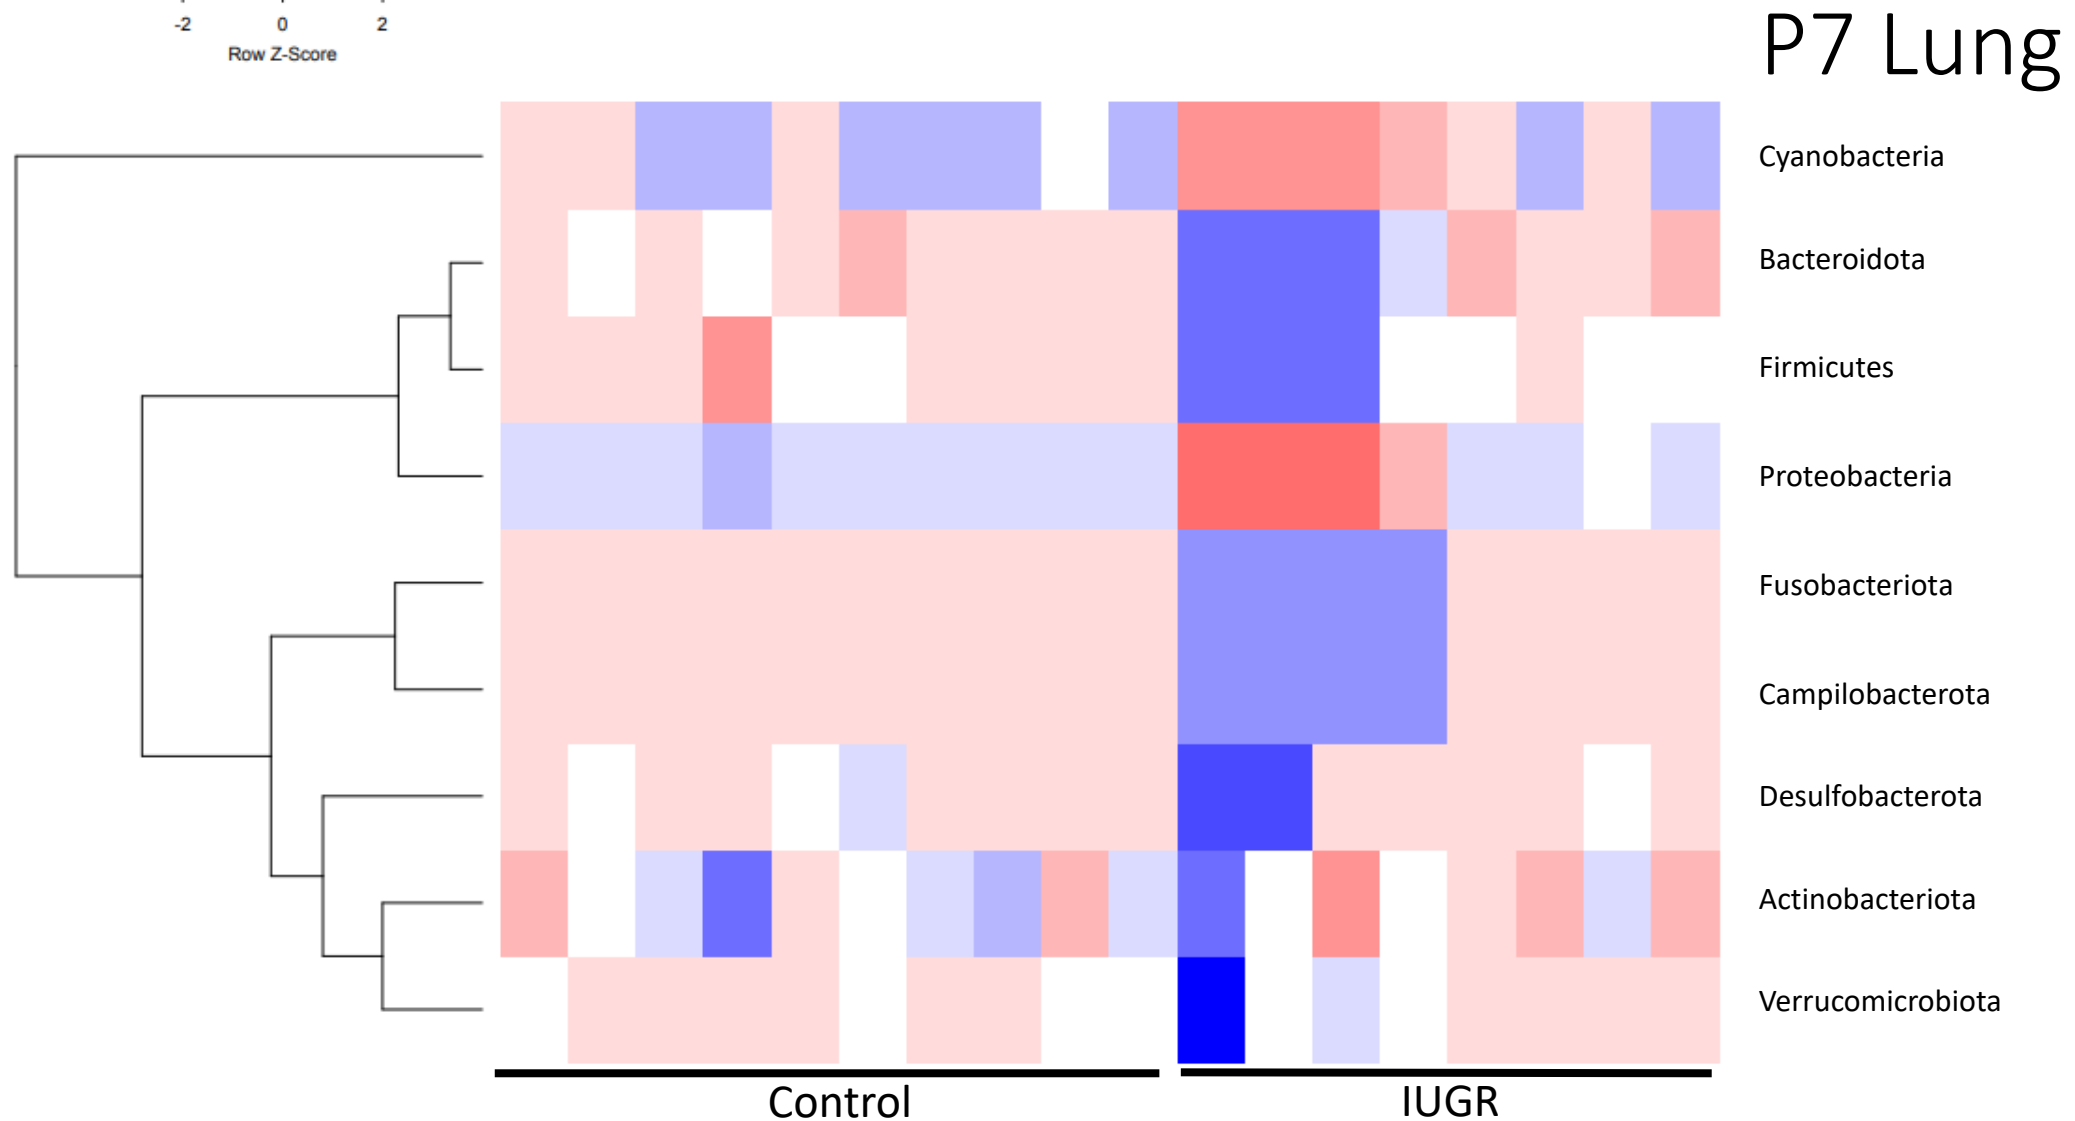

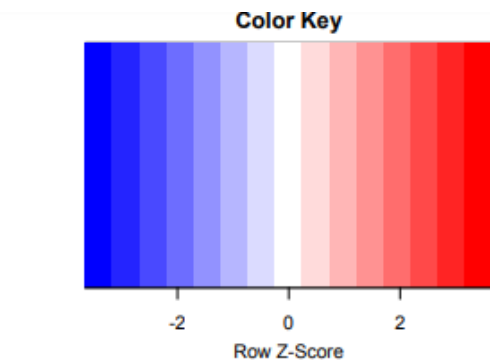

Figure S5: Heatmap of intestinal microbiota in rats on postnatal day 7.

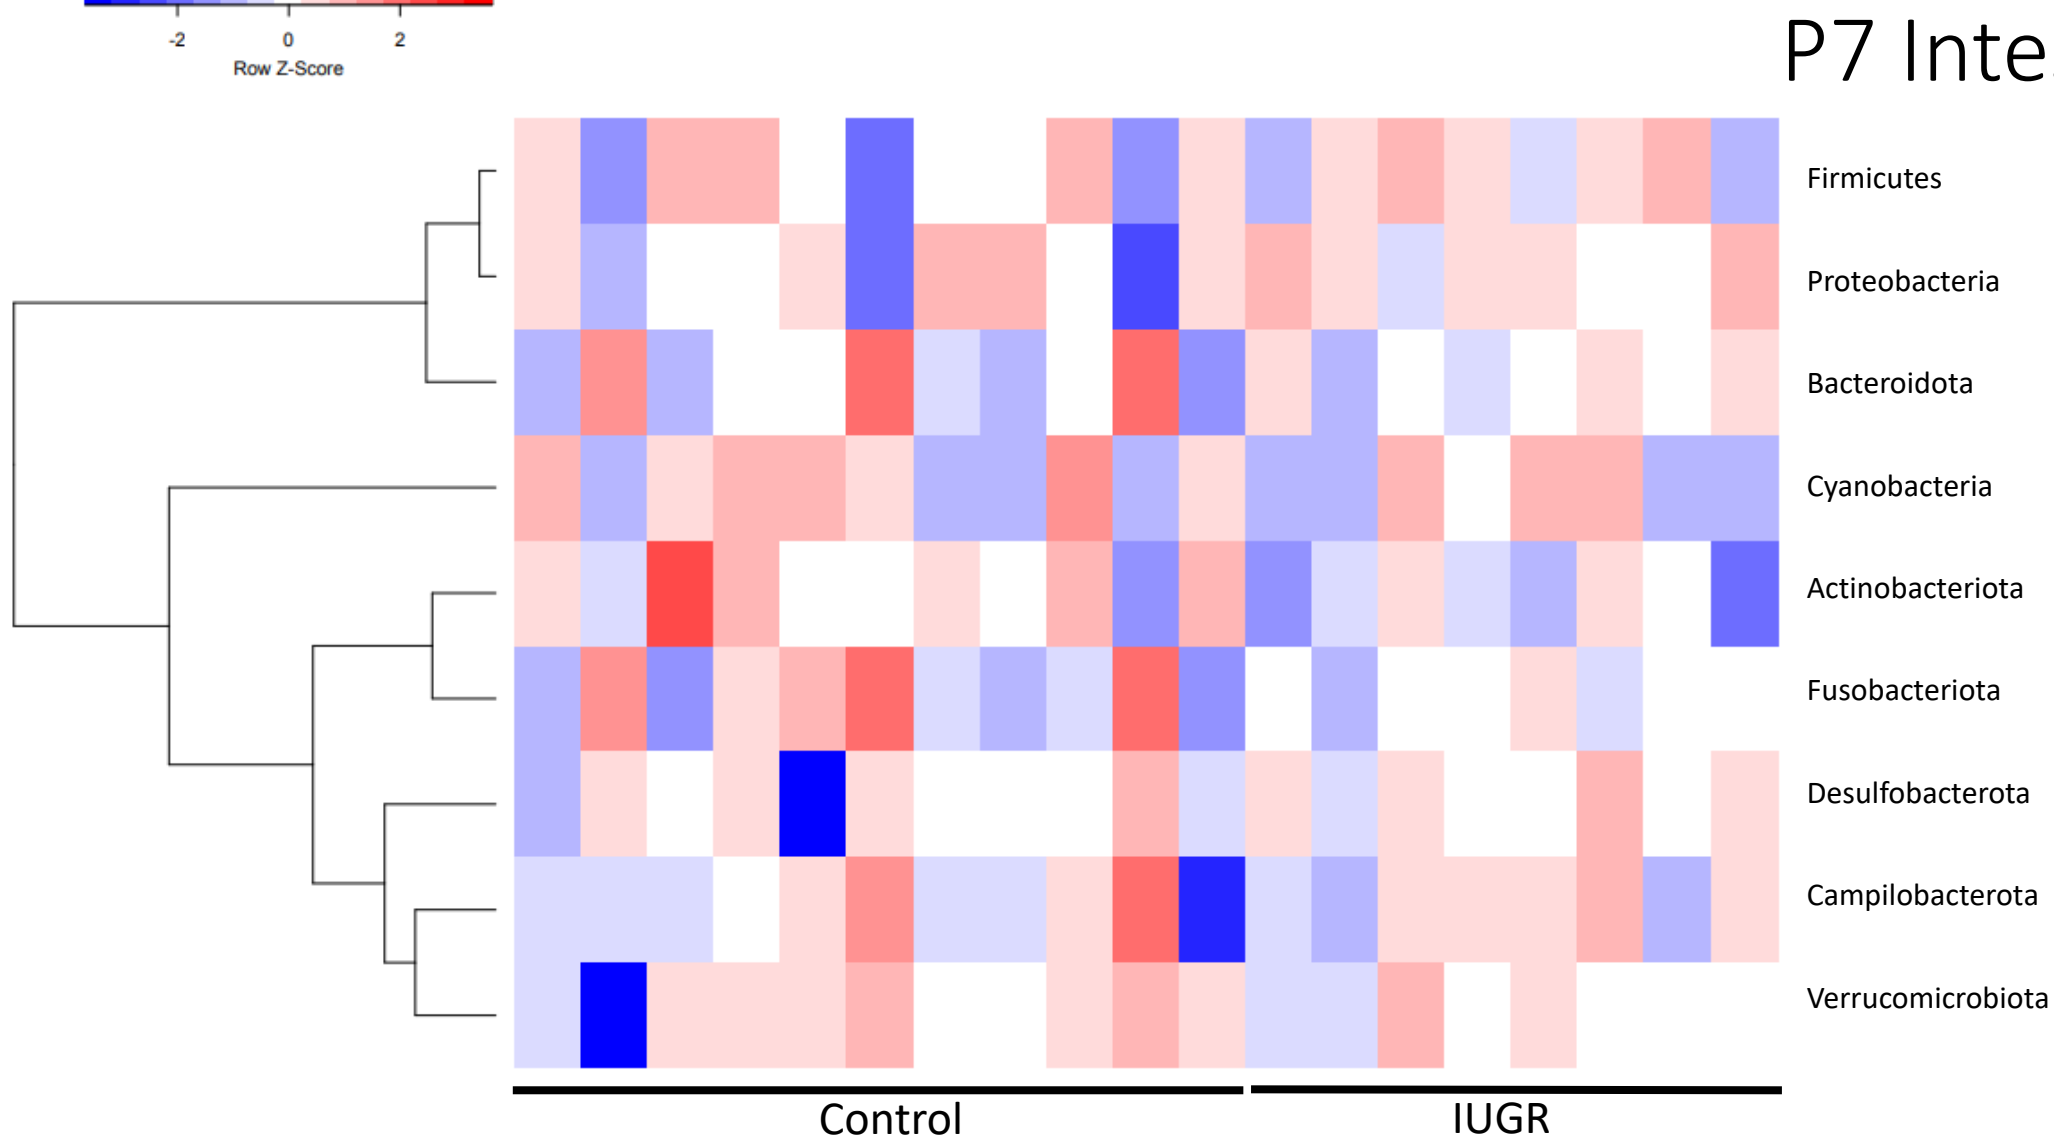

Supplement: s1 [file s1]
